# Supplementary material for: Objective Identification of Intermediate Lesions Inducing Myocardial Ischemia Using Sequential Intracoronary Pressure and Flow Measurements
Source: PubMed Central journal article supplement — J Am Heart Assoc. 2020 Jun 23;9(13):e015559. doi: 10.1161/JAHA.119.015559 (PMC7670511; doi:10.1161/jaha.119.015559), 2020-06-23
Supplement: JAH3-9-e015559-s001.pdf [file JAH3-9-e015559-s001.pdf]

# **SUPPLEMENTAL MATERIAL**

**Table S1. iFR: PPV, NPV, sensitivity and specificity.**

|       | iFR≤0.89 (+) | iFR>0.89 (-) | Total |
|-------|--------------|--------------|-------|
| CFC + | 115          | 91           | 206   |
| CFC - | 21           | 139          | 160   |
| Total | 136          | 230          |       |

PPV:  $115/206 = 55.8\%$

NPV:  $139/160 = 86.9\%$

Sensitivity:  $115/136 = 84.6\%$

Specificity:  $139/230 = 60.4\%$

CFC                      Coronary Flow Capacity  
CFR                      Coronary Flow Reserve  
FFR                      Fractional Flow Reserve  
iFR                      instantaneous wave-free ratio  
NPV                      Negative Predictive Value  
PPV                      Positive Predictive Value

**Table S2. FFR: PPV, NPV, sensitivity and specificity.**

|       | FFR $\leq$ 0.80 (+) | FFR $>$ 0.80 (-) | Total |
|-------|---------------------|------------------|-------|
| CFC + | 96                  | 22               | 118   |
| CFC - | 110                 | 138              | 248   |
| Total | 206                 | 160              |       |

PPV:  $96/118 = 81.4\%$

NPV:  $138 /248 = 55.6\%$

Sensitivity:  $96/206 = 46.6\%$

Specificity:  $138/160 = 86.3\%$

CFC                      Coronary Flow Capacity  
CFR                      Coronary Flow Reserve  
FFR                      Fractional Flow Reserve  
iFR                      instantaneous wave-free ratio  
NPV                      Negative Predictive Value  
PPV                      Positive Predictive Value

**Table S3. CFR: PPV, NPV, sensitivity and specificity.**

|       | CFR<2. (+) | CFR≥2.0 (-) | Total |
|-------|------------|-------------|-------|
| CFC + | 185        | 0           | 185   |
| CFC - | 21         | 160         | 1     |
| Total | 206        | 160         |       |

PPV:  $185/185 = 100\%$

NPV:  $160/181 = 88\%$

Sensitivity:  $185/206 = 89.8\%$

Specificity:  $160/160 = 100\%$

CFC                      Coronary Flow Capacity  
CFR                      Coronary Flow Reserve  
FFR                      Fractional Flow Reserve  
iFR                      instantaneous wave-free ratio  
NPV                      Negative Predictive Value  
PPV                      Positive Predictive Value
